# Supplementary material for: Copy number variants implicate cardiac function and development pathways in earthquake-induced stress cardiomyopathy
Source: PubMed Central journal article supplement (PMC5954162; doi:10.1038/s41598-018-25827-5), 2018-05-15
Supplement: 41598_2018_25827_MOESM1_ESM.pdf [file 41598_2018_25827_MOESM1_ESM.pdf]

# **Copy number variants implicate cardiac function and development pathways in earthquake-induced stress cardiomyopathy**

## **Authors**

Cameron J. Lacey, Kit Doudney, Paul G. Bridgman, Peter M. George, Roger T. Mulder, Julie J. Zarifeh, Bridget Kimber, Murray J. Cadzow, Michael A. Black, Tony R. Merriman, Klaus Lehnert, Vivienne M Bickley, John F. Pearson, Vicky A. Cameron, Martin A. Kennedy.

## **Supplementary information**

Supplementary details:

|                                                                 |    |
|-----------------------------------------------------------------|----|
| Analysis of candidate variants and genes identified in WES data | p2 |
| Heart-healthy control cohort                                    | p2 |
| The Cardio-MetaboChip                                           | p3 |
| ArrayCGH platforms used                                         | p3 |

Supplementary Figure S1: CNV interpretation algorithm p4

Supplementary Table S1: Complete CNV detection list of EqSCM cases in this study p5

Supplementary Table S2: Exome read count and coverage metrics p16

## Supplementary details

### Analysis of candidate variants and genes identified in WES data:

The chosen genotype prevalence cut off of 4/24 in the case cohort was an empirical threshold derived by iterative analysis. For example, when we filtered out all variants present at >3% MAF in 1000G, and required that variants be present in 4/24 samples, 131 variants remained on the list. Requiring the genotype to occur in a higher or lower proportion of cases resulted in respectively too few or too many variants for analysis.

The chosen MAF cut-off of >3% was also determined empirically, but reflected a desire to be inclusive of relatively common mutations or rare SNPs that might be relevant. We reasoned that with the strong environmental precipitant (exposure to a devastating series of earthquakes), and the requirement for post-menopausal status, an underlying predisposing genetic factor could be relatively common, in contrast to Mendelian diseases where the MAF cut-offs are typically much lower. Setting the MAF cut-off lower than 3% in our study resulted in very few candidate variants.

This list of genes was examined initially by a consideration of published gene function and expression data, predicted severity of the variant, as well as manual inspection of the BAM files to examine the context of the putative variant. Many of the variants proved to be artefacts of either the reference database (such as the minor allele being listed as a reference allele), or alignment issues, such as in repetitive sequence regions. We evaluated a handful of variants by Sanger sequencing on EQ-SCM cases in parallel with controls, and in all cases, the putative variants were excluded from further consideration (in most cases because they proved not to be present in the DNA).

### Heart-Healthy Control Cohort:

The controls used in the Cardio-Metabochip analyses were a subset of the Canterbury Healthy Volunteers Cohort (total  $n > 3,400$ ), who were randomly selected from Canterbury electoral rolls, age- and gender-matched to existing patient cohorts (Ellis et al, 2011). They have no personal history of diagnosed cardiovascular disease at the time of recruitment, as indicated by a data search of the NZ Health Information Service (NZHIS) and a questionnaire confirming the absence of cardiovascular symptoms. Recruitment for this study commenced in January 2002 and is ongoing. Anthropometric measures, information on personal health, family heart history, heart disease risk factors and clinical characteristics are recorded and blood and DNA sampled at recruitment. Clinical events are documented from the NZHIS (median follow-up >5 years). (Ethics approval CTY/01/05/062).

Ellis, K. L. et al. Genomic risk variants at 1p13.3, 1q41, and 3q22.3 are associated with subsequent cardiovascular outcomes in healthy controls and in established coronary artery disease. *Circ Cardiovasc Genet* 4, 636-646, doi:10.1161/CIRCGENETICS.111.960336 (2011).

### The Cardio-MetaboChip:

The custom Illumina iSelect Cardio-MetaboChip genotyping array (Voight et al., 2012) was designed to test ~200,000 SNPs (single gene polymorphisms), identified through genome-wide meta-analyses for metabolic, atherosclerotic and cardiovascular diseases and traits. The Cardio-MetaboChip was designed by representatives of the following GWAS meta-analysis Consortia: CARDIoGRAM (coronary artery disease), DIAGRAM (type 2 diabetes), GIANT (height and weight), MAGIC (glycemic traits), LIPIDS (lipids), ICBP-GWAS (blood pressure), and QT-IGC (QT interval). The traits covered by the panel of genetic variants on the chip include myocardial infarction (MI) and CHD, type 2 diabetes (T2D), T2D age diagnosed, T2D early onset, mean platelet volume, platelet count, white blood cell, HDL cholesterol, LDL cholesterol, triglycerides, total cholesterol, body mass index, waist hip ratio (BMI adjusted), waist circumference (BMI adjusted), height, percent fat mass, fasting glucose, fasting insulin, 2hr glucose, HbA1c, systolic blood pressure, diastolic blood pressure and QT interval.

Voight, B. F. et al. The metabochip, a custom genotyping array for genetic studies of metabolic, cardiovascular, and anthropometric traits. PLoS Genet 8, e1002793, doi:10.1371/journal.pgen.1002793 (2012).

ArrayCGH platforms used:

The Nimblegen arrays (135,000 probes across the genome) were used until the manufacturer stopped producing arrays, and we were required to move to a new platform. We then switched to Agilent arrays (180,000 probes), which provide similar coverage levels. We used both platforms on a subset of samples, and detected the same pattern of CNVs, including common (benign) and UCS CNVs. Full details of platforms used for each case are listed below:

aCGH platforms used for specific samples:

Nimblegen: TAK001, 2, 3, 4, 5, 6, 9, 10, 12, 13, 14, 15, 16, 17, 18, 19

Agilent: TAK002, 5, 7, 8, 11, 17, 19, 20, 21, 22, 23, 24, 25, 26, 27, 28

Samples analysed on both platforms: TAK002, 5, 17, 19

**Supplementary Figure S1: Copy number variant interpretation algorithm.**

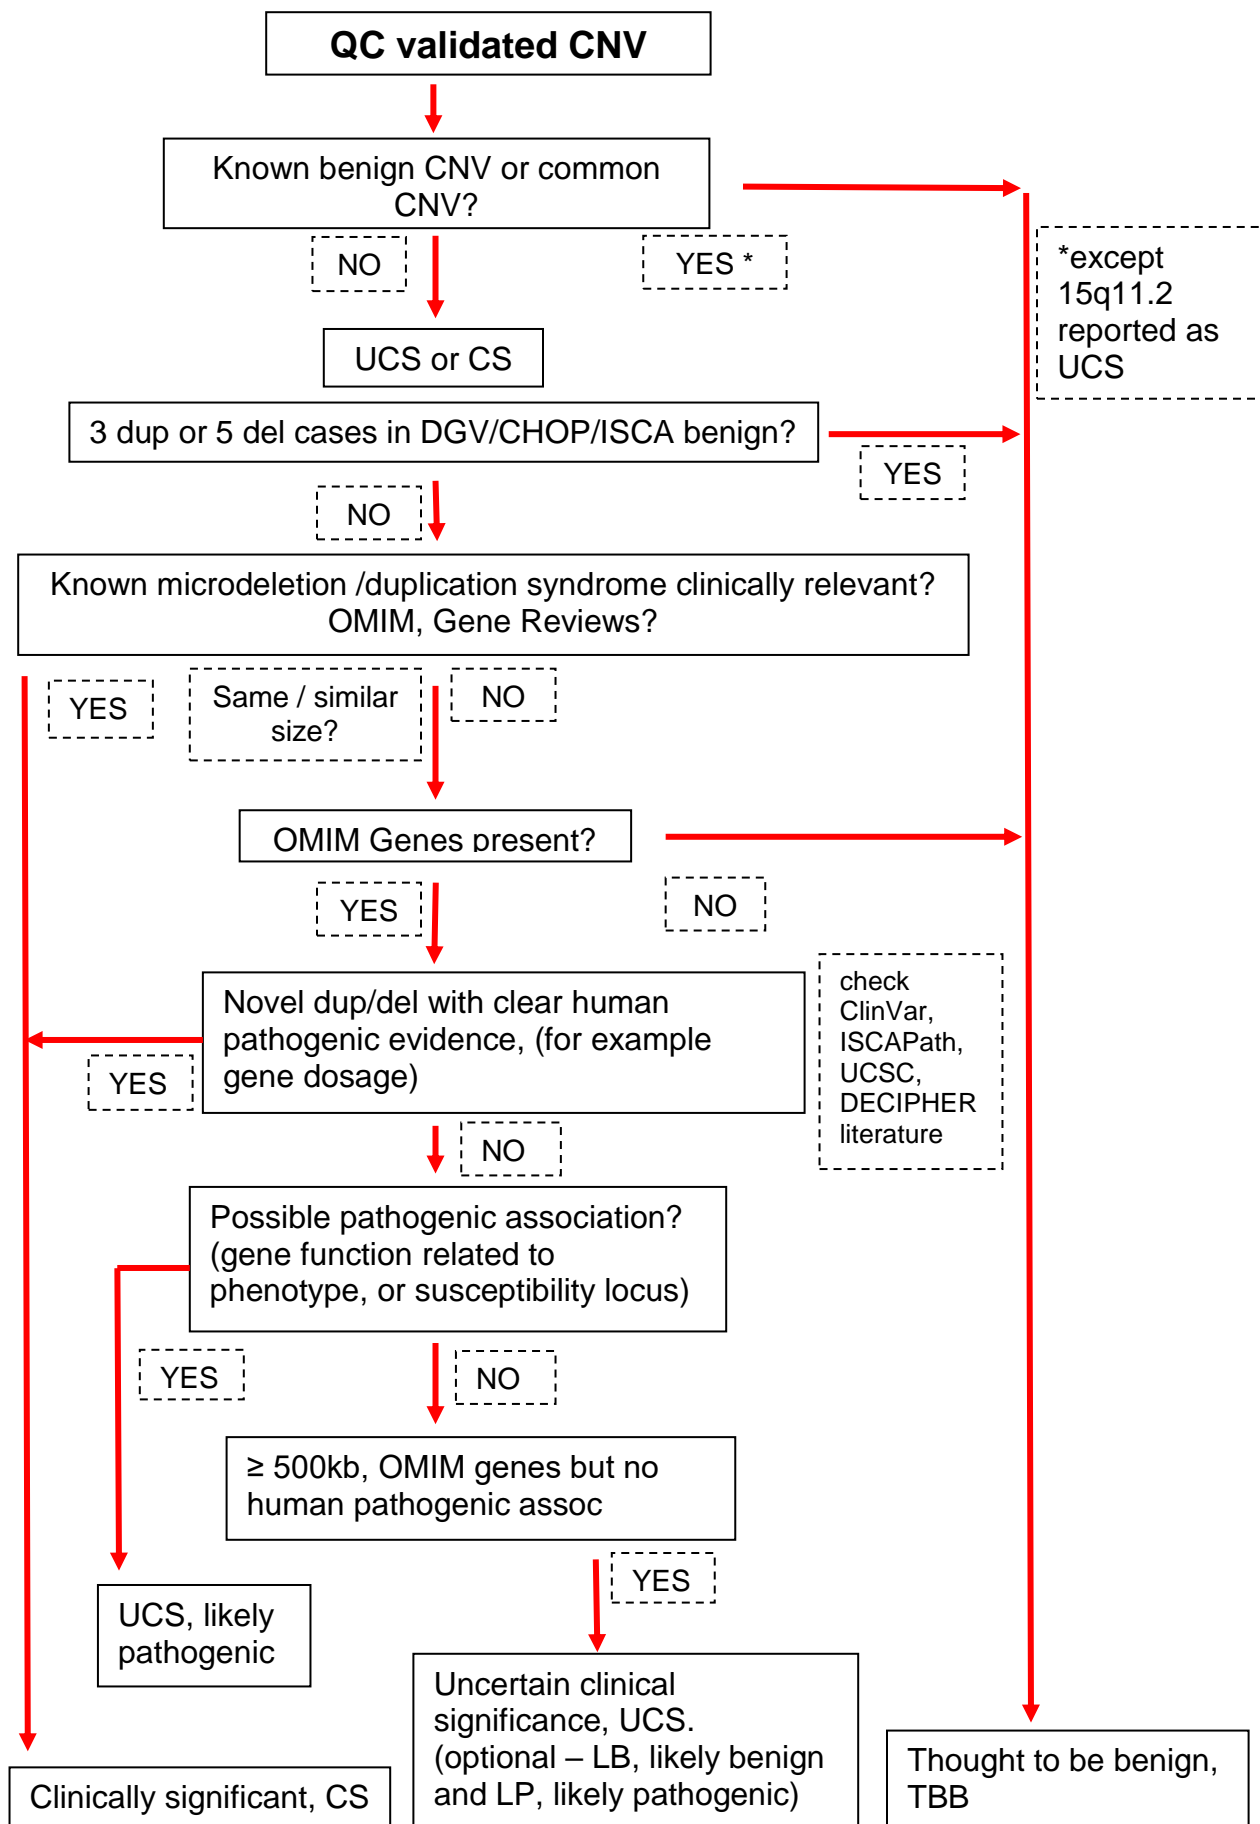

**Supplementary Table S1: Complete list of CNVs detected in EqSCM cases in this study**

| Case               | Hg19 coordinates                  | Call <sup>1</sup> | Location | CNV <sup>2</sup> | Size (kb) | Probes <sup>3</sup> | Gene content                         |
|--------------------|-----------------------------------|-------------------|----------|------------------|-----------|---------------------|--------------------------------------|
| EqSCM01            | HG19 chr2:52,115,336-52,248,029   | TBB               | 2p16.3   | DEL              | 132       | 5                   | Agenic. Area of CNV.                 |
|                    | HG19 chr6:81,731,577-81,872,706   | TBB               | 6q14.1   | DUP              | 141       | 5                   | Agenic. Area of CNV.                 |
|                    | HG19 chr8:39,246,789-39,371,410   | TBB               | 8p11.23  | DUP              | 124       | 7                   | CNV 78                               |
|                    | HG19 chr14:22,562,556-22,953,081  | TBB               | 14q11.2  | DUP              | 390       | 38                  | CNV 62                               |
|                    | HG19 chr16:7,054,481-7,193,526    | UCS               | 16p13.2  | DEL              | 139       | 15                  | RBFOX1                               |
| EqSCM02            | HG19 chr8:39,246,789-39,371,410   | TBB               | 8p11.23  | DUP              | 124       | 7                   | CNV 78                               |
|                    | HG19 chr14:22,562,556-22,959,329  | TBB               | 14q11.2  | DUP              | 396       | 39                  | CNV 62                               |
|                    | HG19 chrX:3,751,569-3,853,478     | TBB               | Xp22.33  | DUP              | 101       | 12                  | CNV 82                               |
| EqSCM03<br>NV13850 | HG19 chr8:39,246,789-39,394,134   | TBB               | 8p11.23  | DUP              | 147       | 8                   | CNV 78                               |
|                    | HG19 chr10:46,980,340-47,148,281  | TBB               | 10q11.22 | DUP              | 167       | 28                  | CNV 79                               |
|                    | HG19 chr17:44,194,591-44,275,529  | TBB               | 17q21.31 | DEL              | 80        | 14                  | CNV 91                               |
|                    | HG19 chr21:19,537,178-19,633,275  | UCS               | 21q21.1  | DEL              | 96        | 9                   | CHODL                                |
|                    | HG19 chr22:23,055,148-24,991,669  | CS                | 22q11.22 | DUP              | 1.94Mb    | 171                 | 21 genes - from MIR650 to IGL.       |
|                    | HG19 chrX:153,411,634-153,514,972 | TBB               | Xq28     | DUP              | 103       | 9                   | CNV 83                               |
| EqSCM04            | HG19 chr1:46,144,479-46,599,815   | UCS               | 1p34.1   | DUP              | 455       | 17                  | IPP, TMEM69, GPBP1L1, MAST1, PIK3R3. |
|                    | HG19 chr1:248,752,348-248,788,877 | TBB               | 1q44     | DUP              | 36        | 5                   | CNV 44                               |
|                    | HG19 chr14:22,562,556-22,959,329  | TBB               | 14q11.2  | DEL              | 396       | 39                  | CNV 62                               |
|                    | HG19 chr17:44,194,591-44,275,529  | TBB               | 17q21.31 | DEL              | 80        | 14                  | CNV 91                               |
|                    | HG19 chrX:3,751,569-3,853,478     | TBB               | Xp22.33  | DUP              | 101       | 12                  | CNV 82                               |
|                    | HG19 chr19:20,617,028-20,714,335  | TBB               | 19p12    | DEL              | 97        | 7                   | Common deletion in DGV.              |
| EqSCM05            | HG19 chr10:65,998,732-66,193,916  | TBB               | 10q21.3  | DEL              | 195       | 7                   | Agenic. Area of CNV.                 |
|                    | HG19 chr14:22,477,962-22,943,320  | TBB               | 14q11.2  | DUP              | 465       | 42                  | CNV 62                               |

|         |                                    |                                  |          |          |      |     |                                       |                                                 |
|---------|------------------------------------|----------------------------------|----------|----------|------|-----|---------------------------------------|-------------------------------------------------|
|         | HG19 chrX:3,751,569-3,853,478      | TBB                              | Xp22.33  | DEL      | 101  | 12  | CNV 82                                |                                                 |
|         | HG19 chrX:107,896,435-108,009,609  | UCS                              | Xq22.3   | DUP      | 113  | 9   | IRS4, COL4A5.                         |                                                 |
| EqSCM06 | HG19 chr1:248,752,348-248,788,877  | TBB                              | 1q44     | DUP      | 36   | 5   | CNV 44                                |                                                 |
|         | HG19 chr3:46,799,630-46,849,443    | TBB                              | 3p21.31  | DEL      | 48   | 5   | CNV 84                                |                                                 |
|         | HG19 chr4:79,281,048-79,610,796    | UCS                              | 4q21.21  | DUP      | 329  | 11  | FRAS1, ANX3, LINC01094.               |                                                 |
|         | HG19 chr8:39,246,789-39,371,410    | TBB                              | 8p11.23  | DUP      | 124  | 7   | CNV 78                                |                                                 |
|         | HG19 chr13:92,075,673-92,283,600   | UCS                              | 13q31.3  | DEL      | 207  | 7   | GPC5                                  |                                                 |
|         | HG19 chr14:22,872,080-22,970,084   | TBB                              | 14p11.2  | DUP      | 98   | 13  | CNV62                                 |                                                 |
|         | HG19 chrX:3,751,569-3,853,478      | TBB                              | Xp22.33  | DEL      | 101  | 12  | CNV 82                                |                                                 |
|         | HG19 chrX:153,411,634-153,514,972  | TBB                              | Xq28     | DUP      | 103  | 9   | CNV 83                                |                                                 |
| EqSCM07 | HG19 chr2:89,143,858-89,312,591    | TBB                              | 2p11.2   | DUP      | 168  | 11  | IGK. Common CNV.                      |                                                 |
|         | HG19 chr3:4,070,291-4,144,114      | TBB                              | 3p26.1   | DUP      | 73   | 6   | CNV 68                                |                                                 |
|         | HG19 chr3:162,514,534-162,619,142  | TBB                              | 3q26.1   | DUP      | 104  | 6   | Agenic. Common CNV.                   |                                                 |
|         | HG19 chr4:69,392,545-69,462,439    | UCS-LB                           | 4q13.2   | DEL      | 69   | 6   | UGT2B17                               |                                                 |
|         | HG19 chr8:15,952,011-16,021,745    | TBB                              | 8p22     | DUP      | 69   | 7   | MSR1. CNV9                            |                                                 |
|         | HG19 chr8:39,237,438-39,362,888    | TBB                              | 8p11.22  | DUP      | 125  | 11  | ADAM5P, ADAM3A. Common CNV.           |                                                 |
|         | HG19 chr10:45,247,685-45,349,814   | TBB                              | 10q11.21 | DEL      | 102  | 6   | TMEM72-AS1. Common CNV.               |                                                 |
|         | HG19 chr10:135,254,039-135,377,533 | TBB                              | 10q26.3  | DUP      | 123  | 11  | LOC619207, CYP2E1, SYCE1. Common CNV. |                                                 |
|         |                                    | HG19 chr11:55,377,910-55,450,789 | TBB      | 11q11    | DEL  | 70  | 8                                     | Two copy loss. OR4P4, OR4S2, OR4C6. Common CNV. |
|         |                                    | HG19 chr12:31,281,798-31,393,024 | TBB      | 12p11.21 | DUP  | 111 | 7                                     | Possibly extends to DDX11. Common CNV.          |
|         |                                    | HG19 chr12:52,657,396-53,069,013 | UCS      | 12q13.13 | DUP  | 411 | 32                                    | 17 Keratin genes.                               |
|         | HG19 chr14:19,376,762-20,414,233   | TBB                              | 14q11.2  | DUP      | 1040 | 14  | Common CNV.                           |                                                 |
|         | HG19 chr14:22,342,308-22,964,923   | TBB                              | 14q11.2  | DEL      | 622  | 56  | Common CNV.                           |                                                 |
|         | HG19 chr14:106,334,907-106,966,455 | TBB                              | 14q32.33 | DUP      | 631  | 48  | Common CNV.                           |                                                 |

|         |                                    |        |          |          |      |    |                               |
|---------|------------------------------------|--------|----------|----------|------|----|-------------------------------|
|         | HG19 chr15:20,564,608-22,558,757   | TBB    | 15q11.2- | DUP      | 1990 | 33 | Common CNV.                   |
|         | HG19 chr22:23,056,562-23,245,889   | TBB    | 22q11.22 | DUP      | 189  | 27 | Common CNV.                   |
| EqSCM08 | HG19 chr1:149,041,933-149,243,968  | TBB    | 1q21.2   | DEL      | 202  | 15 | NBPF25P. Common CNV.          |
|         | HG19 chr2:89,143,858-89,312,591    | TBB    | 2p11.2   | DUP      | 168  | 11 | Common CNV.                   |
|         | HG19 chr3:4,070,291-4,144,114      | TBB    | 3p26.1   | DUP      | 73   | 6  | CNV 68                        |
|         | HG19 chr3:162,514,534-162,619,142  | TBB    | 3q26.1   | DUP      | 104  | 6  | Agenic. Common CNV.           |
|         | HG19 chr8:15,952,011-16,021,745    | TBB    | 8p22     | DUP      | 69   | 7  | MSR1. CNV9                    |
|         | HG19 chr8:19,375,578-19,426,577    | UCS-LB | 8p21.3   | DEL      | 51   | 5  | CSGALNACT1                    |
|         | HG19 chr8:39,237,438-39,374,790    | TBB    | 8p11.22  | DUP      | 137  | 12 | ADAM5P, ADAM3A. Common CNV.   |
|         | HG19 chr11:61,476,610-61,553,176   | UCS-LB | 11q12.2  | DUP      | 76   | 8  | DAGLA, C11orf9, DKFZP434K028. |
|         | HG19 chr14:106,334,907-106,966,455 | TBB    | 14q32.33 | DUP      | 631  | 48 | Common CNV.                   |
|         |                                    |        |          | 15q11.1- |      |    |                               |
|         | HG19 chr15:20,172,544-22,558,757   | TBB    | 11.2     | DUP      | 2390 | 37 | Common CNV.                   |
|         | HG19 chr17:44,171,888-44,345,039   | TBB    | 17q21.31 | DUP      | 173  | 12 | Common CNV.                   |
|         | HG19 chr22:23,056,562-23,245,889   | TBB    | 22q11.22 | DUP      | 189  | 27 | Common CNV                    |
|         | HG19 chr22:24,347,959-24,390,255   | TBB    | 22q11.23 | DUP      | 42   | 5  | LOC391322, GSTT1, GSTTP2.     |
| EqSCM09 | HG19 chr1:248,752,348-248,788,877  | TBB    | 1q44     | DEL      | 36   | 5  | CNV 44                        |
|         | HG19 chr3:46,799,630-46,849,443    | TBB    | 3p21.31  | DEL      | 48   | 5  | CNV 84                        |
|         | HG19 chr4:131,956,494-132,348,098  | TBB    | 4q28.3   | DUP      | 391  | 13 | Agenic. Common CNV.           |
| EqSCM10 | HG19 chr1:248,752,348-248,844,848  | TBB    | 1q44     | DEL      | 92   | 6  | CNV 44                        |
|         | HG19 chr8:39,246,789-39,371,410    | TBB    | 8p11.23  | DEL      | 124  | 7  | CNV 78                        |
|         | HG19 chr14:22,634,953-22,953,081   | TBB    | 14q11.2  | DUP      | 318  | 30 | CNV 62                        |
|         | HG19 chr17:44,185,649-44,267,524   | TBB    | 17q21.31 | DUP      | 81   | 14 | CNV 81                        |
|         | HG19 chr19:55,439,927-55,570,442   | UCS    | 19q13.42 | DUP      | 130  | 13 | NLRP7, NLRP2, GP6, RDH13.     |

|         |                                    |     |          |     |     |    |                     |
|---------|------------------------------------|-----|----------|-----|-----|----|---------------------|
| EqSCM11 | HG19 chr2:44,519,680-44,543,829    | TBB | 2p21     | DUP | 24  | 7  | SLC3A1. Common CNV. |
|         | HG19 chr8:39,246,789-39,371,410    | TBB | 8p11.23  | DEL | 124 | 7  | CNV 78              |
|         | HG19 chr10:46,980,161-47,140,244   | TBB | 10q11.22 | DEL | 160 | 7  | Common CNV.         |
|         | HG19 chr14:106,335,742-106,732,386 | TBB | 14q32.33 | DUP | 396 | 6  | Common CNV.         |
|         | HG19 chr22:22,008,249-22,189,094   | UCS | 22q11.21 | DUP | 180 | 51 | PPL2, YPEL1, MAPK1. |
|         | HG19 chrX:3,751,569-3,853,478      | TBB | Xp22.33  | DEL | 84  | 10 | CNV 82              |
|         | HG19 chrX:38,485,991-38,626,762    | UCS | Xp11.4   | DUP | 140 | 15 | TSPAN7              |
| EqSCM12 | HG19 chr8:8,108,863-8,142,313      | TBB | 8p23.1   | DUP | 33  | 6  | Common CNV.         |
|         | HG19 chr8:39,246,789-39,371,410    | TBB | 8p11.23  | DEL | 124 | 7  | Common CNV.         |
|         | HG19 chr14:22,465,154-22,970,084   | TBB | 14q11.2  | DUP | 504 | 47 | CNV 62              |
|         | HG19 chr17:44,206,713-44,275,529   | TBB | 17q21.31 | DUP | 68  | 13 | CNV 81              |
| EqSCM13 | HG19 chr8:39,246,789-39,371,410    | TBB | 8p11.23  | DUP | 124 | 7  | CNV78               |
|         | HG19 chr14:22,374,537-22,970,084   | TBB | 14q11.2  | DUP | 595 | 53 | CNV62               |
|         | HG19 chr17:44,206,713-44,275,529   | TBB | 17q21.31 | DUP | 68  | 13 | CNV 81              |
|         | HG19 chrX:153,422,192-153,514,972  | TBB | Xq28     | DUP | 92  | 5  | CNV 83              |
| EqSCM14 | HG19 chr1:248,752,348-248,788,877  | TBB | 1q44     | DEL | 36  | 5  | CNV 44              |
|         | HG19 chr9:209,254-254,239          | TBB | 9p24.3   | DEL | 44  | 6  | DOCK8. Common CNV.  |
|         | HG19 chr10:46,980,340-47,148,281   | TBB | 10q11.22 | DUP | 167 | 28 | CNV 79              |
|         | HG19 chr17:44,185,649-44,275,529   | TBB | 17q21.31 | DUP | 89  | 15 | CNV 81              |
|         | HG19 chrX:3,763,818-3,853,478      | TBB | Xp22.33  | DEL | 89  | 11 | CNV 82              |
| EqSCM15 | HG19 chr2:242,864,903-243,006,028  | TBB | 2q37.3   | DEL | 141 | 15 | CNV 52              |
|         | HG19 chr8:39,246,789-39,394,134    | TBB | 8p11.23  | DUP | 147 | 8  | CNV 78              |
|         | HG19 chr10:83,506,502-83,585,097   | UCS | 10q23.1  | DUP | 78  | 7  | Upstream of NRG3.   |
|         | HG19 chr17:44,210,699-44,275,529   | TBB | 17q21.31 | DEL | 64  | 12 | CNV 81              |
| EqSCM16 | HG19 chr14:22,792,976-22,982,294   | TBB | 14q11.2  | DUP | 189 | 20 | CNV 62              |



|                                  |                                    |          |                      |      |      |             |                                                                          |
|----------------------------------|------------------------------------|----------|----------------------|------|------|-------------|--------------------------------------------------------------------------|
|                                  | HG19 chr17:44,206,713-44,275,529   | TBB      | 17q21.31             | DEL  | 68   | 13          | CNV 81                                                                   |
|                                  | HG19 chrX:3,751,569-3,853,478      | TBB      | Xp22.33              | DEL  | 101  | 12          | CNV 82                                                                   |
| EqSCM17                          | HG19 chr2:89,143,858-89,312,591    | TBB      | 2p11.2               | DUP  | 168  | 11          | Agenic. Common CNV.                                                      |
|                                  | HG19 chr3:4,070,291-4,144,114      | TBB      | 3p26.1               | DUP  | 73   | 6           | CNV68                                                                    |
|                                  | HG19 chr4:69,392,545-69,462,439    | TBB      | 4q13.2               | DUP  | 69   | 6           | UGT2B17. Common CNV.                                                     |
|                                  | HG19 chr8:15,952,011-16,021,745    | TBB      | 8p22                 | DEL  | 69   | 7           | MSR1 CNV9                                                                |
|                                  | HG19 chr8:39,237,438-39,362,888    | TBB      | 8p11.22              | DUP  | 125  | 11          | ADAM5P, ADAM3A. Common CNV.                                              |
|                                  | HG19 chr10:135,254,039-135,377,533 | TBB      | 10q26.3              | DUP  | 123  | 11          | LOC619207, CYP2E1, SYCE1. Common CNV.                                    |
|                                  | HG19 chr11:55,377,910-55,450,789   | TBB      | 11q11                | DEL  | 72   | 8           | OR4P4, OR4S2, OR4C6. Common CNV. Possibly extends to DDX12P. Common CNV. |
|                                  | HG19 chr12:9,637,323-9,713,426     | TBB      | 12p13.31             | DUP  | 76   | 5           | CNV.                                                                     |
|                                  | HG19 chr13:70,008,862-70,183,894   | TBB      | 13q21.33             | DEL  | 175  | 7           | Agenic.                                                                  |
|                                  | HG19 chr13:102,148,514-102,296,766 | UCS      | 13q33.1              | DEL  | 40   | 4           | ITGBL1, within i1 (may encompass e1)                                     |
|                                  | HG19 chr13:102,148,514-102,296,767 | UCS      | 13q33.2              | DEL  | 50   | 5           | ITGBL1, within i6 (may encompass e5)                                     |
|                                  | HG19 chr14:19,376,762-20,414,233   | TBB      | 14q11.2              | DUP  | 1040 | 14          | Common CNV.                                                              |
|                                  | HG19 chr14:22,342,308-22,964,923   | TBB      | 14q11.2              | DEL  | 622  | 56          | Common CNV.                                                              |
|                                  | HG19 chr14:106,334,907-106,966,455 | TBB      | 14q32.33<br>15q11.1- | DUP  | 631  | 48          | Common CNV.                                                              |
| HG19 chr15:20,481,702-22,558,757 | TBB                                | 11.2     | DUP                  | 2080 | 34   | Common CNV. |                                                                          |
| HG19 chr22:23,056,562-23,245,889 | TBB                                | 22q11.22 | DUP                  | 189  | 27   | Common CNV. |                                                                          |
| HG19 chrX:283,986-401,717        | TBB                                | Xp22.33  | DUP                  | 117  | 18   | Common CNV. |                                                                          |
| EqSCM18                          | HG19 chr12:31,356,144-31,399,162   | TBB      | 12p11.21             | DUP  | 43   | 8           | Common CNV.                                                              |
|                                  | HG19 chrX:3,751,569-3,799,236      | TBB      | Xp22.33              | DEL  | 47   | 7           | CNV82                                                                    |
| EqSCM19                          | HG19 chr3:195,419,168-195,472,856  | TBB      | 3q29                 | DEL  | 53   | 9           | MIR570, MUC20. Common CNV.                                               |
|                                  | HG19 chr6:266,046-370,470          | TBB      | 6p25.3               | DUP  | 104  | 18          | CNV72                                                                    |

|         |                                    |        |                      |     |      |    |                                                                           |
|---------|------------------------------------|--------|----------------------|-----|------|----|---------------------------------------------------------------------------|
|         | HG19 chr13:50,585,186-51,452,033   | UCS    | 13q14.2              | DEL | 886  | 75 | DLEU2, TRIM13, KCNRG, MIR16-1, MIR15A, DLEU1, ST13P4, DLEU7, RNASEH2B-AS1 |
|         | HG19 chr13:111,385,673-111,532,564 | TBB    | 13q34                | DUP | 146  | 11 | LINC00346, ANKRD10.                                                       |
|         | HG19 chr14:22,509,226-22,953,081   | TBB    | 14q11.2              | DUP | 443  | 42 | CNV62                                                                     |
|         | HG19 chr14:106,246,283-106,906,968 | TBB    | 14q32.33<br>15q11.1- | DEL | 660  | 25 | Common CNV.                                                               |
|         | HG19 chr15:20,432,851-22,332,238   | TBB    | 11.2                 | DUP | 1900 | 17 | Common CNV.                                                               |
|         | HG19 chr17:44,206,713-44,275,529   | TBB    | 17q21.31             | DEL | 68   | 13 | CNV 81                                                                    |
| EqSCM20 | HG19 chr1:149,041,933-149,243,968  | TBB    | 1q21.2               | DEL | 170  | 7  | NBPF25P. Common CNV.                                                      |
|         | HG19 chr2:89,143,858-89,312,591    | TBB    | 2p11.2               | DUP | 168  | 11 | Agenic. Common CNV.                                                       |
|         | HG19 chr3:4,070,291-4,144,114      | TBB    | 3p26.1               | DUP | 73   | 6  | Agenic. CNV 68                                                            |
|         | HG19 chr3:195,419,168-195,459,590  | TBB    | 3q29                 | DEL | 40   | 8  | MIR570, MUC20. Common CNV.                                                |
|         | HG19 chr8:15,952,011-16,021,745    | TBB    | 8p22                 | DUP | 69   | 7  | MSR1. CNV9                                                                |
|         | HG19 chr8:39,237,438-39,374,790    | TBB    | 8p11.22              | DUP | 137  | 12 | ADAM5P, ADAM3A Common CNV.                                                |
|         | HG19 chr10:45,247,685-45,349,814   | TBB    | 10q11.21             | DEL | 102  | 6  | TMEM72-AS1 Common CNV.                                                    |
|         | HG19 chr14:106,334,907-106,966,455 | TBB    | 14q32.33             | DUP | 631  | 48 | Common CNV.                                                               |
|         | HG19 chr15:20,432,851-22,558,757   | TBB    | 15q11.2              | DUP | 2130 | 35 | Common CNV.                                                               |
|         | HG19 chr22:23,056,562-23,245,889   | TBB    | 22q11.22             | DUP | 189  | 27 | Common CNV.                                                               |
| EqSCM21 | HG19 chr2:89,143,858-89,312,591    | TBB    | 2p11.2               | DUP | 168  | 11 | IGK. Common CNV.                                                          |
|         | HG19 chr3:4,070,291-4,144,114      | TBB    | 3p26.1               | DUP | 73   | 6  | CNV 68                                                                    |
|         | HG19 chr3:162,514,534-162,619,142  | TBB    | 3q26.1               | DUP | 104  | 6  | Common CNV.                                                               |
|         | HG19 chr3:195,419,168-195,472,856  | TBB    | 3q29                 | DEL | 53   | 9  | MIR570, MUC20. Common CNV.                                                |
|         | HG19 chr4:69,392,545-69,462,439    | UCS-LB | 4q13.2               | DUP | 69   | 6  | UGT2B17. Common CNV.                                                      |
|         | HG19 chr7:142,825,843-142,890,669  | TBB    | 7q34                 | DEL | 64   | 6  | PIP, TAS2R39. Common CNV.                                                 |
|         | HG19 chr8:15,952,011-16,021,745    | TBB    | 8p22                 | DUP | 69   | 7  | MSR1. CNV9                                                                |

|         |                                    |        |          |     |      |    |                                                                |
|---------|------------------------------------|--------|----------|-----|------|----|----------------------------------------------------------------|
|         | HG19 chr8:39,237,438-39,374,790    | TBB    | 8p11.22  | DUP | 137  | 12 | ADAM5P, ADAM3A. Common CNV.                                    |
|         | HG19 chr11:55,377,910-55,450,789   | TBB    | 11q11    | DEL | 72   | 8  | OR4P4, OR4S2, OR4C6. Common CNV.                               |
|         | HG19 chr12:86,925,372-87,027,515   | TBB    | 12q21.32 | DEL | 102  | 9  | MGAT4C, MIR548AL.                                              |
|         | HG19 chr14:22,360,671-22,952,280   | TBB    | 14q11.2  | DEL | 591  | 53 | CNV62                                                          |
|         | HG19 chr14:106,334,907-106,966,455 | TBB    | 14q32.33 | DUP | 631  | 48 | Common CNV.                                                    |
|         |                                    |        | 15q11.1- |     |      |    |                                                                |
|         | HG19 chr15:20,603,042-22,558,757   | TBB    | 11.2     | DUP | 1960 | 30 | Common CNV.                                                    |
|         | HG19 chr22:23,056,562-23,245,889   | TBB    | 22q11.22 | DUP | 189  | 27 | Common CNV.                                                    |
|         | HG19 chr22:24,347,959-24,390,255   | TBB    | 22q11.23 | DUP | 42   | 5  | LOC391322, GSTT1, GSTTP2.                                      |
| EqSCM22 | HG19 chr1:149,041,933-149,224,044  | TBB    | 1q21.2   | DEL | 182  | 14 | NBPF25P. Common CNV.                                           |
|         | HG19 chr2:89,143,858-89,312,591    | TBB    | 2p11.2   | DUP | 168  | 11 | IGK. Common CNV.                                               |
|         | HG19 chr3:4,070,291-4,144,114      | TBB    | 3p26.1   | DUP | 73   | 6  | CNV 68                                                         |
|         | HG19 chr3:162,514,534-162,619,142  | TBB    | 3q26.1   | DUP | 104  | 5  | Common CNV.                                                    |
|         | HG19 chr3:195,419,168-195,472,856  | TBB    | 3q29     | DEL | 53   | 9  | MIR570, MUC20. Common CNV.                                     |
|         | HG19 chr4:69,392,545-69,462,439    | UCS-LB | 4q13.2   | DUP | 69   | 5  | UGT2B17. Common CNV.                                           |
|         | HG19 chr8:15,952,011-16,021,745    | TBB    | 8p22     | DUP | 69   | 7  | MSR1. CNV9                                                     |
|         | HG19 chr14:19,728,641-20,414,233   | TBB    | 14q11.2  | DUP | 685  | 13 | Common CNV.                                                    |
|         | HG19 chr14:22,360,671-22,976,317   | TBB    | 14q11.3  | DEL | 615  | 53 | Common CNV.                                                    |
|         | HG19 chr14:106,334,907-106,966,455 | TBB    | 14q32.33 | DUP | 631  | 46 | Common CNV.                                                    |
|         | HG19 chr15:20,432,851-22,558,757   | TBB    | 15q11.2  | DUP | 2130 | 35 | Common CNV.                                                    |
|         | HG19 chr22:23,056,562-23,245,889   | TBB    | 22q11.22 | DUP | 189  | 26 | Common CNV.                                                    |
|         | HG19 chr22:24,347,959-24,390,255   | TBB    | 22q11.23 | DUP | 42   | 5  | LOC391322, GSTT1, GSTTP2.                                      |
|         |                                    |        |          |     |      |    | LINC00152, MIR4435-1, MIR4435-2, PLGLB2, PLGLB1, RGPD1, RGPD2. |
| EqSCM23 | HG19 chr2:87,105,194-88,297,442    | TBB    | 2p11.2   | DUP | 1190 | 13 | Common CNV.                                                    |
|         | HG19 chr2:89,143,858-89,312,591    | TBB    | 2p11.2   | DUP | 168  | 11 | IGK. Common CNV.                                               |
|         | HG19 chr3:4,070,291-4,144,114      | TBB    | 3p26.1   | DUP | 73   | 6  | CNV 68                                                         |

|         |                                    |        |              |     |      |    |                                               |
|---------|------------------------------------|--------|--------------|-----|------|----|-----------------------------------------------|
|         | HG19 chr3:162,514,534-162,619,142  | TBB    | 3q26.1       | DUP | 104  | 6  | Common CNV.                                   |
|         | HG19 chr4:69,392,545-69,462,439    | UCS-LB | 4q13.2       | DUP | 69   | 6  | UGT2B17. Common CNV.                          |
|         | HG19 chr8:15,952,011-16,021,745    | TBB    | 8p22         | DUP | 69   | 7  | MSR1. CNV9                                    |
|         | HG19 chr8:39,237,438-39,374,790    | TBB    | 8p11.22      | DUP | 137  | 12 | ADAM5P, ADAM3A. Common CNV.                   |
|         | HG19 chr10:45,247,685-45,349,814   | TBB    | 10q11.21     | DEL | 102  | 6  | TMEM72-AS1. Common CNV.                       |
|         | HG19 chr10:46,984,913-47,148,547   | TBB    | 10q11.22     | DEL | 163  | 13 | Common CNV.                                   |
|         | HG19 chr14:19,376,762-20,414,233   | TBB    | 14q11.2      | DUP | 1040 | 14 | Common CNV.                                   |
|         | HG19 chr14:22,342,308-22,964,923   | TBB    | 14q11.2      | DEL | 622  | 56 | Common CNV.                                   |
|         | HG19 chr14:106,334,907-106,966,455 | TBB    | 14q32.33     | DUP | 631  | 48 | Common CNV.                                   |
|         | HG19 chr17:44,197,448-44,345,039   | TBB    | 17q21.31     | DUP | 147  | 10 | Common CNV.                                   |
|         | HG19 chr22:23,056,562-23,245,889   | TBB    | 22q11.22     | DUP | 189  | 27 | Common CNV.                                   |
| EqSCM24 | HG19 chr1:149,041,933-149,209,290  | TBB    | 1q21.2       | DEL | 167  | 13 | NBPF25P. Common CNV.                          |
|         | HG19 chr2:89,143,858-89,312,591    | TBB    | 2p11.2       | DUP | 168  | 11 | IGK. Common CNV.                              |
|         | HG19 chr3:4,070,291-4,144,114      | TBB    | 3p26.1       | DUP | 73   | 6  | CNV 68                                        |
|         | HG19 chr3:162,514,534-162,619,142  | TBB    | 3q26.1       | DUP | 104  | 5  | Common CNV.                                   |
|         | HG19 chr3:195,419,168-195,457,766  | TBB    | 3q29         | DEL | 38   | 7  | MIR570, MUC20. Common CNV.                    |
|         | HG19 chr4:69,392,545-69,462,439    | UCS-LB | 4q13.2       | DUP | 69   | 5  | UGT2B17. Common CNV.                          |
|         | HG19 chr8:15,952,011-16,021,745    | TBB    | 8p22         | DUP | 69   | 7  | MSR1. CNV9<br>LOC619207, CYP2E1, SYCE1 Common |
|         | HG19 chr8:39,237,438-39,362,888    | TBB    | 10q26.3      | DUP | 125  | 11 | CNV.                                          |
|         | HG19 chr10:45,247,685-45,349,814   | TBB    | 10q11.21     | DEL | 102  | 6  | TMEM72-AS1. Common CNV.                       |
|         | HG19 chr10:46,976,157-47,148,547   | TBB    | 10q11.22     | DUP | 172  | 14 | Common CNV.                                   |
|         | HG19 chr11:134,353,814-134,711,673 | TBB    | 11q25        | DUP | 357  | 19 | LOC283177. Common CNV.                        |
|         | HG19 chr14:106,334,907-106,966,455 | TBB    | 14q32.33     | DUP | 631  | 46 | Common CNV.                                   |
|         | HG19 chr15:20,603,042-22,558,757   | TBB    | 15q11.1-11.2 | DUP | 1960 | 30 | Common CNV.                                   |
|         | HG19 chr22:23,056,562-23,245,889   | TBB    | 22q11.22     | DUP | 189  | 26 | Common CNV.                                   |

|         |                                    |          |          |     |     |    |                                                                |
|---------|------------------------------------|----------|----------|-----|-----|----|----------------------------------------------------------------|
|         | HG19 chr22:24,347,959-24,390,255   | TBB      | 22q11.23 | DUP | 42  | 5  | LOC391322, GSTT1, GSTTP2.                                      |
| EqSCM25 | HG19 chr2:89,143,858-89,312,591    | TBB      | 2p11.2   | DUP | 168 | 11 | IGK. Common CNV.                                               |
|         | HG19 chr3:4,070,291-4,144,114      | TBB      | 3p26.1   | DUP | 73  | 6  | CNV 68                                                         |
|         | HG19 chr3:162,514,534-162,619,142  | TBB      | 3q26.1   | DUP | 104 | 5  | Common CNV.                                                    |
|         | HG19 chr3:195,419,168-195,444,194  | TBB      | 3q29     | DEL | 25  | 5  | LINC00969, MIR570.                                             |
|         | HG19 chr8:15,952,011-16,021,745    | TBB      | 8p22     | DUP | 69  | 7  | MSR1. CNV9                                                     |
|         | HG19 chr8:39,237,438-39,362,888    | TBB      | 8p11.22  | DUP | 125 | 11 | ADAM5P, ADAM3A. Common CNV.                                    |
|         | HG19 chr10:45,247,685-45,349,814   | TBB      | 10q11.21 | DEL | 102 | 6  | TMEM72-AS1. Common CNV.                                        |
|         | HG19 chr11:55,377,910-55,450,789   | TBB      | 11q11    | DEL | 72  | 8  | OR4P4, OR4S2, OR4C6. Common CNV.                               |
|         | HG19 chr11:134,353,814-134,711,673 | TBB      | 11q25    | DUP | 357 | 19 | LOC283177. Common CNV. Possibly extends to DDX12P. Common CNV. |
|         | HG19 chr12:9,637,323-9,713,426     | TBB      | 12p13.31 | DUP | 76  | 5  |                                                                |
|         | HG19 chr14:19,728,641-20,414,233   | TBB      | 14q11.2  | DUP | 685 | 13 | Common CNV.                                                    |
|         | HG19 chr14:22,360,671-22,976,317   | TBB      | 14q11.3  | DEL | 615 | 53 | Common CNV.                                                    |
|         | HG19 chr14:104,793,823-104,936,775 | TBB      | 14q32.33 | DUP | 142 | 9  | Common CNV.                                                    |
|         | HG19 chr14:106,334,907-106,966,455 | TBB      | 14q32.33 | DUP | 631 | 46 | Common CNV.                                                    |
|         |                                    | TBB/UCS- |          |     |     |    |                                                                |
|         | HG19 chr15:32,021,733-32,510,864   | LB       | 15q13.3  | DUP | 489 | 27 | CHRNA7                                                         |
|         | HG19 chr19:20,607,860-20,701,621   | TBB      | 19p12    | DEL | 93  | 5  | ZNF826P. Common CNV.                                           |
|         | HG19 chr22:23,056,562-23,245,889   | TBB      | 22q11.22 | DUP | 189 | 26 | Common CNV.                                                    |
|         | HG19 chr22:24,347,959-24,390,255   | TBB      | 22q11.23 | DUP | 42  | 5  | LOC391322, GSTT1, GSTTP2.                                      |
| EqSCM26 | HG19 chr1:248,727,929-248,785,563  | TBB      | 1q44     | DEL | 57  | 6  | CNV 44                                                         |
|         | HG19 chr2:37,959,707-37,994,075    | TBB      | 2p22.2   | DUP | 34  | 5  | Common CNV.                                                    |
|         | HG19 chr2:89,143,858-89,312,591    | TBB      | 2p11.2   | DUP | 168 | 11 | IGK. Common CNV.                                               |
|         | HG19 chr3:4,070,291-4,144,114      | TBB      | 3p26.1   | DUP | 73  | 6  | CNV 68                                                         |
|         | HG19 chr3:195,419,168-195,472,856  | TBB      | 3q29     | DEL | 53  | 9  | MIR570, MUC20. Common CNV.                                     |

|         |                                    |     |          |     |      |    |                                                                   |
|---------|------------------------------------|-----|----------|-----|------|----|-------------------------------------------------------------------|
|         | HG19 chr8:15,952,011-16,021,745    | TBB | 8p22     | DUP | 69   | 7  | MSR1. CNV9                                                        |
|         | HG19 chr8:39,237,438-39,374,790    | TBB | 8p11.22  | DUP | 137  | 12 | ADAM5P, ADAM3A. Common CNV.                                       |
|         | HG19 chr10:45,247,685-45,349,814   | TBB | 10q11.21 | DEL | 102  | 6  | TMEM72-AS1. Common CNV.                                           |
|         | HG19 chr12:9,637,323-9,713,426     | TBB | 12p13.31 | DUP | 76   | 5  | May extend to DDX12P. Common CNV.                                 |
|         | HG19 chr14:22,368,864-22,976,317   | TBB | 14q11.2  | DEL | 607  | 52 | Common CNV.                                                       |
|         | HG19 chr14:106,334,907-106,966,455 | TBB | 14q32.33 | DUP | 631  | 46 | Common CNV.                                                       |
|         |                                    |     | 15q11.1- |     |      |    |                                                                   |
|         | HG19 chr15:20,172,544-22,558,757   | TBB | 11.2     | DUP | 2390 | 37 | Common CNV.                                                       |
|         |                                    |     |          |     |      |    | IGSF6, OTOA, METTL9, RRN3P1.                                      |
|         | HG19 chr16:21,599,687-21,951,439   | TBB | 16p12.2  | DEL | 351  | 13 | Common CNV.                                                       |
|         | HG19 chr17:44,171,888-44,345,039   | TBB | 17q21.31 | DUP | 173  | 12 | Common CNV.                                                       |
|         | HG19 chr22:23,056,562-23,245,889   | TBB | 22q11.22 | DUP | 189  | 26 | Common CNV.                                                       |
|         |                                    |     |          |     |      |    |                                                                   |
|         |                                    |     |          |     |      |    | MIR3675, NBPF1, CROCCP2, MST1P2, MIR3675, ESPNP, MST1P9, MIR3675. |
| EqSCM27 | HG19 chr1:16,840,487-17,231,818    | TBB | 1p36.13  | DEL | 391  | 10 | Common CNV.                                                       |
|         | HG19 chr2:89,143,858-89,312,591    | TBB | 2p11.2   | DUP | 168  | 11 | IGK. Common CNV.                                                  |
|         | HG19 chr3:4,070,291-4,144,114      | TBB | 3p26.1   | DUP | 73   | 6  | CNV 68                                                            |
|         | HG19 chr3:195,419,168-195,459,590  | TBB | 3q29     | DEL | 40   | 8  | MIR570, MUC20. Common CNV.                                        |
|         | HG19 chr7:110,744,611-110,849,681  | UCS | 7q31.1   | DEL | 105  | 10 | IMMP2L, LRRN3.                                                    |
|         | HG19 chr8:15,952,011-16,021,745    | TBB | 8p22     | DUP | 69   | 7  | MSR1. CNV9                                                        |
|         | HG19 chr8:39,237,438-39,362,888    | TBB | 8p11.22  | DUP | 125  | 11 | ADAM5P, ADAM3A. Common CNV.                                       |
|         | HG19 chr14:19,728,641-20,414,233   | TBB | 14q11.2  | DUP | 685  | 13 | Common CNV.                                                       |
|         | HG19 chr14:106,334,907-106,966,455 | TBB | 14q32.33 | DUP | 631  | 48 | Common CNV.                                                       |
|         |                                    |     | 15q11.1- |     |      |    |                                                                   |
|         | HG19 chr15:20,481,702-22,558,757   | TBB | 11.2     | DUP | 2080 | 34 | Common CNV.                                                       |
|         | HG19 chr22:23,056,562-23,245,889   | TBB | 22q11.22 | DUP | 189  | 27 | Common CNV.                                                       |
|         | HG19 chr22:24,347,959-24,390,255   | TBB | 22q11.23 | DUP | 42   | 5  | LOC391322, GSTT1, GSTTP2.                                         |
|         |                                    |     |          |     |      |    |                                                                   |
| EqSCM28 | HG19 chr6:266,079-375,950          | TBB | 6p25.3   | DEL | 109  | 19 | Common CNV.                                                       |
|         | HG19 chr8:39,246,720-39,371,396    | TBB | 8p11.22  | DEL | 124  | 7  | ADAM5P, ADAM3A. Common CNV.                                       |

|                                    |                |          |     |     |    |                            |
|------------------------------------|----------------|----------|-----|-----|----|----------------------------|
| HG19 chr9:398,958-561,122          | TBB UCS-<br>LB | 9p24.3   | DUP | 162 | 17 | DOCK8, KANK1. Area of CNV. |
| HG19 chr10:46,980,161-47,140,244   | TBB            | 10q11.22 | DEL | 160 | 7  | Common CNV.                |
| HG19 chr14:106,335,742-106,732,386 | TBB            | 14q32.33 | DUP | 396 | 6  | Common CNV.                |
| HG19 chr14:106,921,691-107,208,511 | TBB            | 14q32.34 | DUP | 286 | 12 | Common CNV.                |

<sup>1</sup> Call (interpretation of CNV functional significance – refer Supp. Fig. S1). CS, Clinically significant; TBB, Thought to be benign; UCS, Uncertain clinical significance; UCS–LB, UCS likely benign; UCS-LP, UCS likely pathogenic.

<sup>2</sup> Nature of CNV. Duplication (dup) or deletion (del).

<sup>3</sup> Number of arrayCGH probes generating the signal

**Supplementary Table S2: Exome read count and coverage metrics**

| Sample | TARGET_TERRITORY | TOTAL_READS | MEAN_TARGET_COVERAGE | TARGET_BASES_10X | TARGET_BASES_20X | TARGET_BASES_30X |
|--------|------------------|-------------|----------------------|------------------|------------------|------------------|
| TAK001 | 62,085,286       | 19,440,510  | 14.52                | 0.67             | 0.27             | 0.06             |
| TAK002 | 62,085,286       | 23,259,954  | 17.70                | 0.73             | 0.41             | 0.15             |
| TAK003 | 62,085,286       | 26,280,648  | 19.85                | 0.76             | 0.48             | 0.21             |
| TAK004 | 62,085,286       | 24,470,786  | 18.30                | 0.73             | 0.43             | 0.17             |
| TAK005 | 62,085,286       | 17,249,925  | 13.16                | 0.62             | 0.22             | 0.04             |
| TAK006 | 62,085,286       | 19,741,681  | 14.83                | 0.66             | 0.31             | 0.08             |
| TAK007 | 62,085,286       | 18,084,914  | 13.71                | 0.64             | 0.24             | 0.05             |
| TAK008 | 62,085,286       | 18,509,610  | 14.15                | 0.66             | 0.26             | 0.06             |
| TAK009 | 62,085,286       | 19,986,364  | 15.30                | 0.68             | 0.31             | 0.08             |
| TAK010 | 62,085,286       | 19,775,844  | 14.83                | 0.68             | 0.28             | 0.07             |
| TAK011 | 62,085,286       | 20,101,353  | 15.23                | 0.69             | 0.30             | 0.07             |
| TAK012 | 62,085,286       | 16,932,783  | 13.00                | 0.61             | 0.22             | 0.04             |
| TAK013 | 62,085,286       | 26,260,934  | 19.08                | 0.74             | 0.40             | 0.17             |
| TAK014 | 62,085,286       | 30,737,799  | 20.62                | 0.77             | 0.45             | 0.21             |
| TAK015 | 62,085,286       | 24,568,099  | 16.88                | 0.70             | 0.33             | 0.12             |
| TAK016 | 62,085,286       | 23,365,465  | 16.71                | 0.69             | 0.32             | 0.12             |
| TAK017 | 62,085,286       | 19,823,276  | 14.31                | 0.63             | 0.24             | 0.08             |
| TAK018 | 62,085,286       | 26,818,236  | 19.46                | 0.75             | 0.41             | 0.18             |
| TAK019 | 62,085,286       | 22,463,554  | 16.28                | 0.68             | 0.31             | 0.11             |
| TAK020 | 62,085,286       | 24,225,495  | 17.69                | 0.72             | 0.36             | 0.14             |
| TAK021 | 62,085,286       | 26,375,671  | 18.97                | 0.74             | 0.40             | 0.17             |
| TAK022 | 62,085,286       | 25,536,206  | 18.61                | 0.73             | 0.39             | 0.16             |
| TAK023 | 62,085,286       | 23,748,264  | 17.25                | 0.71             | 0.34             | 0.13             |
| TAK024 | 62,085,286       | 27,887,246  | 20.22                | 0.76             | 0.44             | 0.20             |
| min    |                  | 16,932,783  | 13.00                | 0.61             | 0.22             | 0.04             |
| mean   |                  | 22,735,192  | 16.69                | 0.70             | 0.34             | 0.12             |
| max    |                  | 30,737,799  | 20.62                | 0.77             | 0.48             | 0.21             |
| SD     |                  | 3,642,944   | 2.31                 | 0.05             | 0.08             | 0.05             |
